# Supplementary material
Source: PubMed Central journal article supplement (PMC2695838)
Supplement: NIHMS92519-supplement-Supp_table_1.pdf [file NIHMS92519-supplement-Supp_table_1.pdf]

**Supplementary Table 1.** Primer sequences used for Real time PCR. Primers were designed using Primer Bank (<http://pga.mgh.harvard.edu/primerbank/>).

| <b><u>Gene</u></b> | <b><u>Forward Primer</u></b>  | <b><u>Reverse Primer</u></b> |
|--------------------|-------------------------------|------------------------------|
| FLNA               | 5'-GTCGCTCTCAGGAACAGCAG-3'    | 5'-AGGGGACGGCCCTTTAAT-3'     |
| <i>WNT5A</i>       | 5'-TAAGCCCAGGAGTTGCTTTG-3'    | 5'-GCAGAGAGGCTGTGCTCCTA-3'   |
| CAPN1              | 5'-GAAGCGTCCCACGGAAGT-3'      | 5'-CAGGAGGGTGTTCGTTGAGA-3'   |
| CAPN2              | 5'-AATTTTGTTCGGTGTTCGTTTCG-3' | 5'-AGAGCCAAGAGATAAGGTCGAG-3' |
