# Supplementary material
Source: PubMed Central journal article supplement (PMC2695838)

SUPPLEMENTARY FIGURE 1.

A

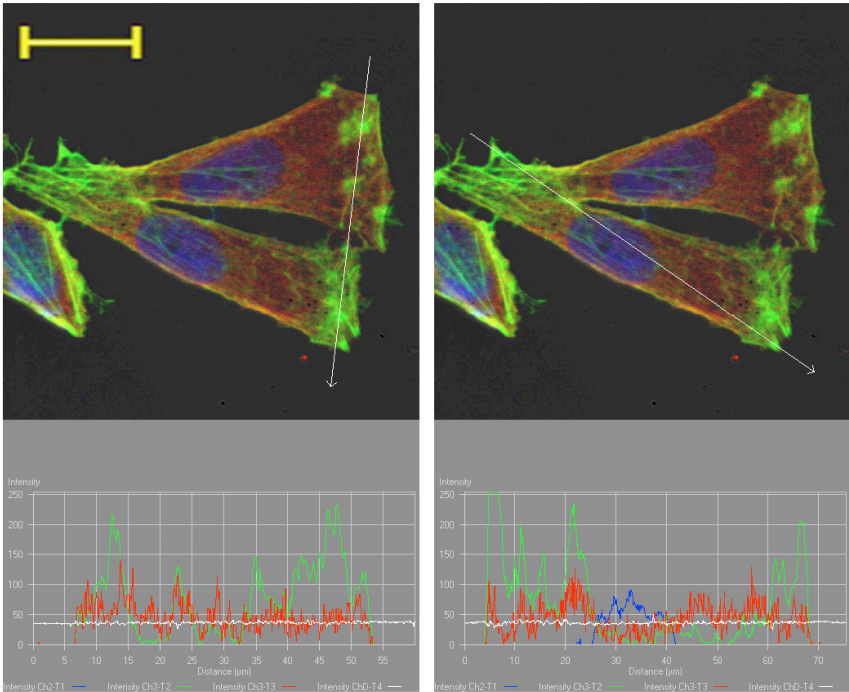

B

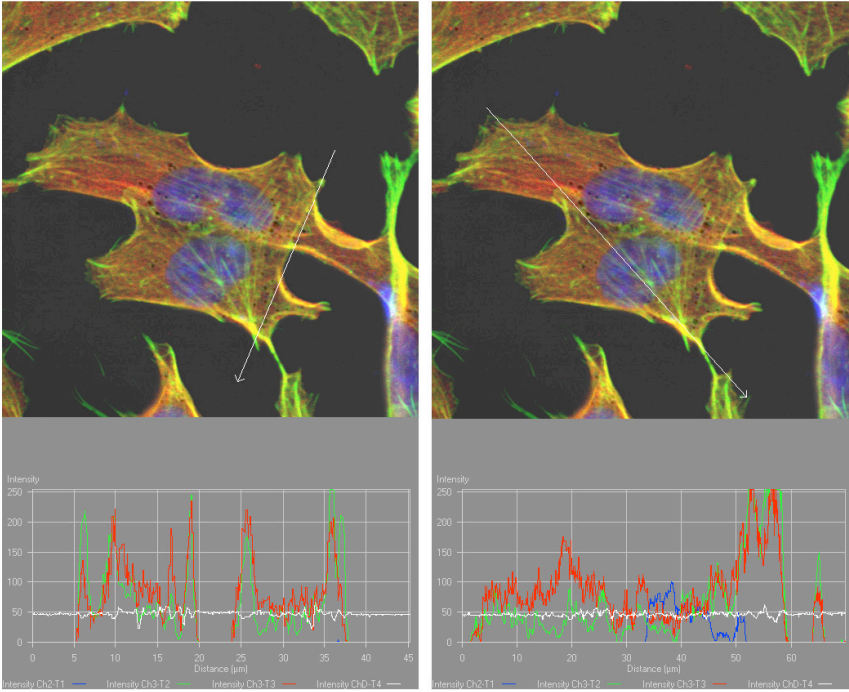

Supplement: NIHMS92519-supplement-Supp_fig_1.pdf [file NIHMS92519-supplement-Supp_fig_1.pdf]
